# Supplementary material for: Valorization of Gleditsia triacanthos Invasive Plant Cellulose Microfibers and Phenolic Compounds for Obtaining Multi-Functional Wound Dressings with Antimicrobial and Antioxidant Properties
Source: PubMed Central journal article supplement (PMC7792949; doi:10.3390/ijms22010033), 2020-12-22
Supplement: ijms-22-00033-s001.pdf [file ijms-22-00033-s001.pdf]

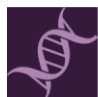

Table S1. The UHPLC-MS/MS identification and quantification data of phenolic acids (PAs) and flavonoids in the alcoholic extract of *Gleditsia triachantos*

| Compound Name              | Exact Mass <sup>a</sup><br>[M-H] <sup>-</sup> | Accurate Mass<br>[M-H] <sup>-</sup> | Mass Fragments<br>(Intensity, %)                               | Collision Energy<br>(eV) | Concentration<br>(µg/L) |
|----------------------------|-----------------------------------------------|-------------------------------------|----------------------------------------------------------------|--------------------------|-------------------------|
| <b>Phenolic Acids (PA)</b> |                                               |                                     |                                                                |                          |                         |
| 4-hydroxy benzoic acid     | 137.0243                                      | 137.0232                            | 93.0331                                                        | 30                       | 570.37                  |
| vanillic acid              | 167.0349                                      | 167.0343                            | 152.0105, 124.0154,<br>111.0075, 139.0025, 95.0125             | 60                       | 773.88                  |
| syringic acid              | 197.0455                                      | 197.0450                            | 182.0212, 166.9976,<br>153.0547, 138.0311, 123.0075            | 30                       | 163.71                  |
| protocatechuic acid        | 153.0188                                      | 153.0183                            | 109.0281                                                       | 35                       | 235.61                  |
| gallic acid                | 169.0142                                      | 169.0133                            | 125.0231                                                       | 35                       | 86.28                   |
| p-coumaric acid            | 163.0400                                      | 163.0392                            | 119.0489                                                       | 35                       | 192.96                  |
| ferulic acid               | 193.0506                                      | 193.0500                            | 178.0262, 134.0361                                             | 30                       | 319.81                  |
| caffeic acid               | 179.0349                                      | 179.0342                            | 135.044                                                        | 30                       | 153.97                  |
| <b>Flavonoids</b>          |                                               |                                     |                                                                |                          |                         |
| catechin                   | 289.0717                                      | 289.0719                            | 109.0282, 125.0232,                                            | 35                       | 34,271.15               |
| epicatechin                | 289.0717                                      | 289.0719                            | 137.0232, 151.0390,<br>203.0708, 245.0817                      |                          | 1,431.47                |
| pinocembrin                | 255.0662                                      | 255.0663                            | 213.0551, 151.0026, 107.0125                                   | 40                       | 11.34                   |
| pinostrobin                | 269.0819                                      | 269.0822                            | 179.0554,                                                      | 45                       | 602.94                  |
| crystin                    | 253.0506                                      | 253.0506                            | 143.0491, 145.0284,<br>107.0125, 209.0603, 63.0226,<br>65.0019 | 60                       | 21.52                   |
| apigenin                   | 269.0455                                      | 269.0457                            | 117.0333, 151.0027, 107.0126                                   | 60                       | 676.17                  |
| quercetin                  | 301.0353                                      | 301.0356                            | 151.0226, 178.9977,<br>121.0282, 107.0125                      | 35                       | 3,007.89                |
| isorhamnetin               | 315.0509                                      | 315.0512                            | 300.0276                                                       | 45                       | 228.61                  |
| kaempferol                 | 285.0404                                      | 285.0406                            | 285.0405                                                       | 45                       | N.d.                    |
| myricetin                  | 317.0302                                      | 317.0306                            | 289.0720, 179.0342                                             | 30                       | 1,259.97                |
| galangin                   | 269.0455                                      | 269.0458                            | 169.0650, 143.0491,                                            | 80                       | 2.51                    |
| rutin                      | 609.1460                                      | 609.1469                            | 420.1880, 187.0969                                             | 30                       | 1,302.31                |
| hesperidin                 | 609.1824                                      | 609.1823                            | 301.0171                                                       | 30                       | 13.07                   |
| naringin                   | 579.1718                                      | 579.1720                            | 271.0612, 459.1133, 151.0026                                   | 30                       | 168.63                  |

<sup>a</sup> Calculated mass of the parent ion using free chemical database, ChemSpider; n.d.-not detected.
